# Supplementary material
Source: Springer Nature journal article supplement (https://www.springermedizin.de/resource/supplementary/13054_2010_8817_MOESM4_ESM.pdf/9732644)

**Change in PCT concentration %**

140,0  
120,0  
100,0  
80,0  
60,0  
40,0  
20,0  
0,0  
-20,0  
-40,0  
-60,0

**p=0.036**

**\***

**\***

**Survivor**

**Non-survivor**

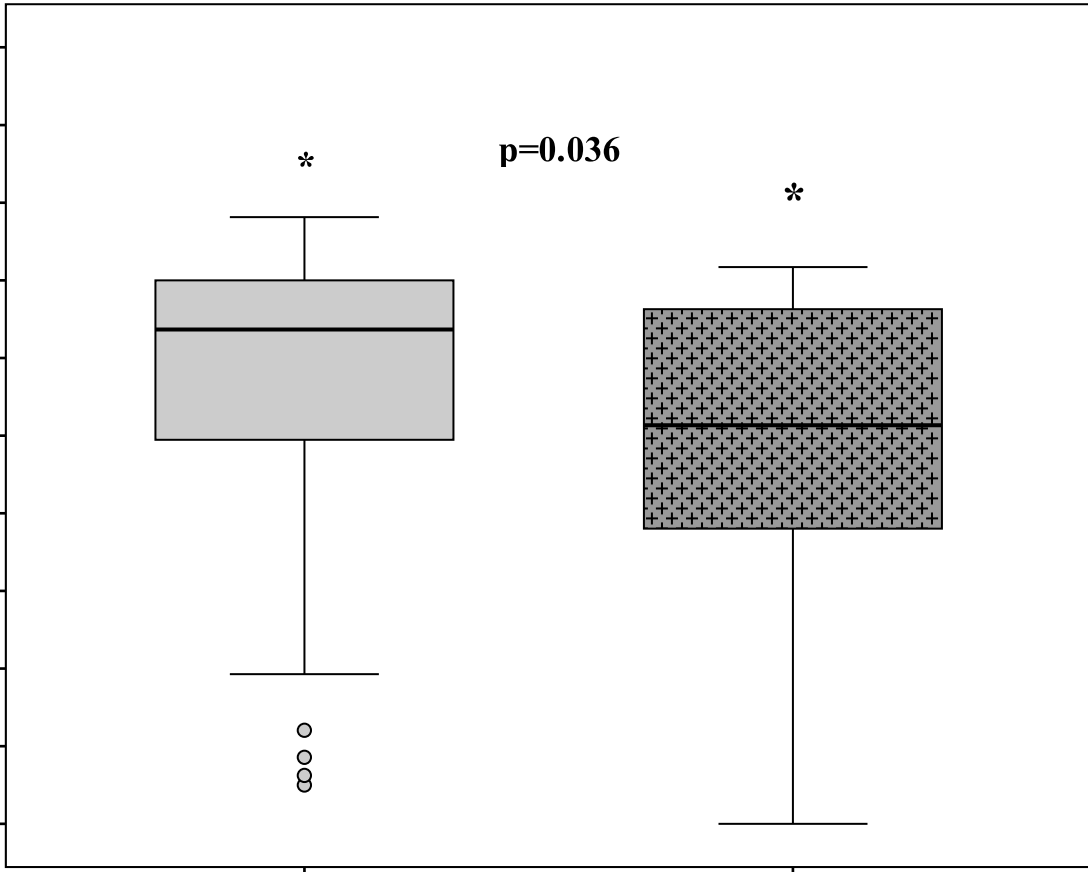

Supplement: MOESM4 [file 9732644]
